# Supplementary material
Source: PubMed Central journal article supplement (PMC2817492)
Supplement: NIHMS28190-supplement-1.pdf [file NIHMS28190-supplement-1.pdf]

Supplementary Figure 1

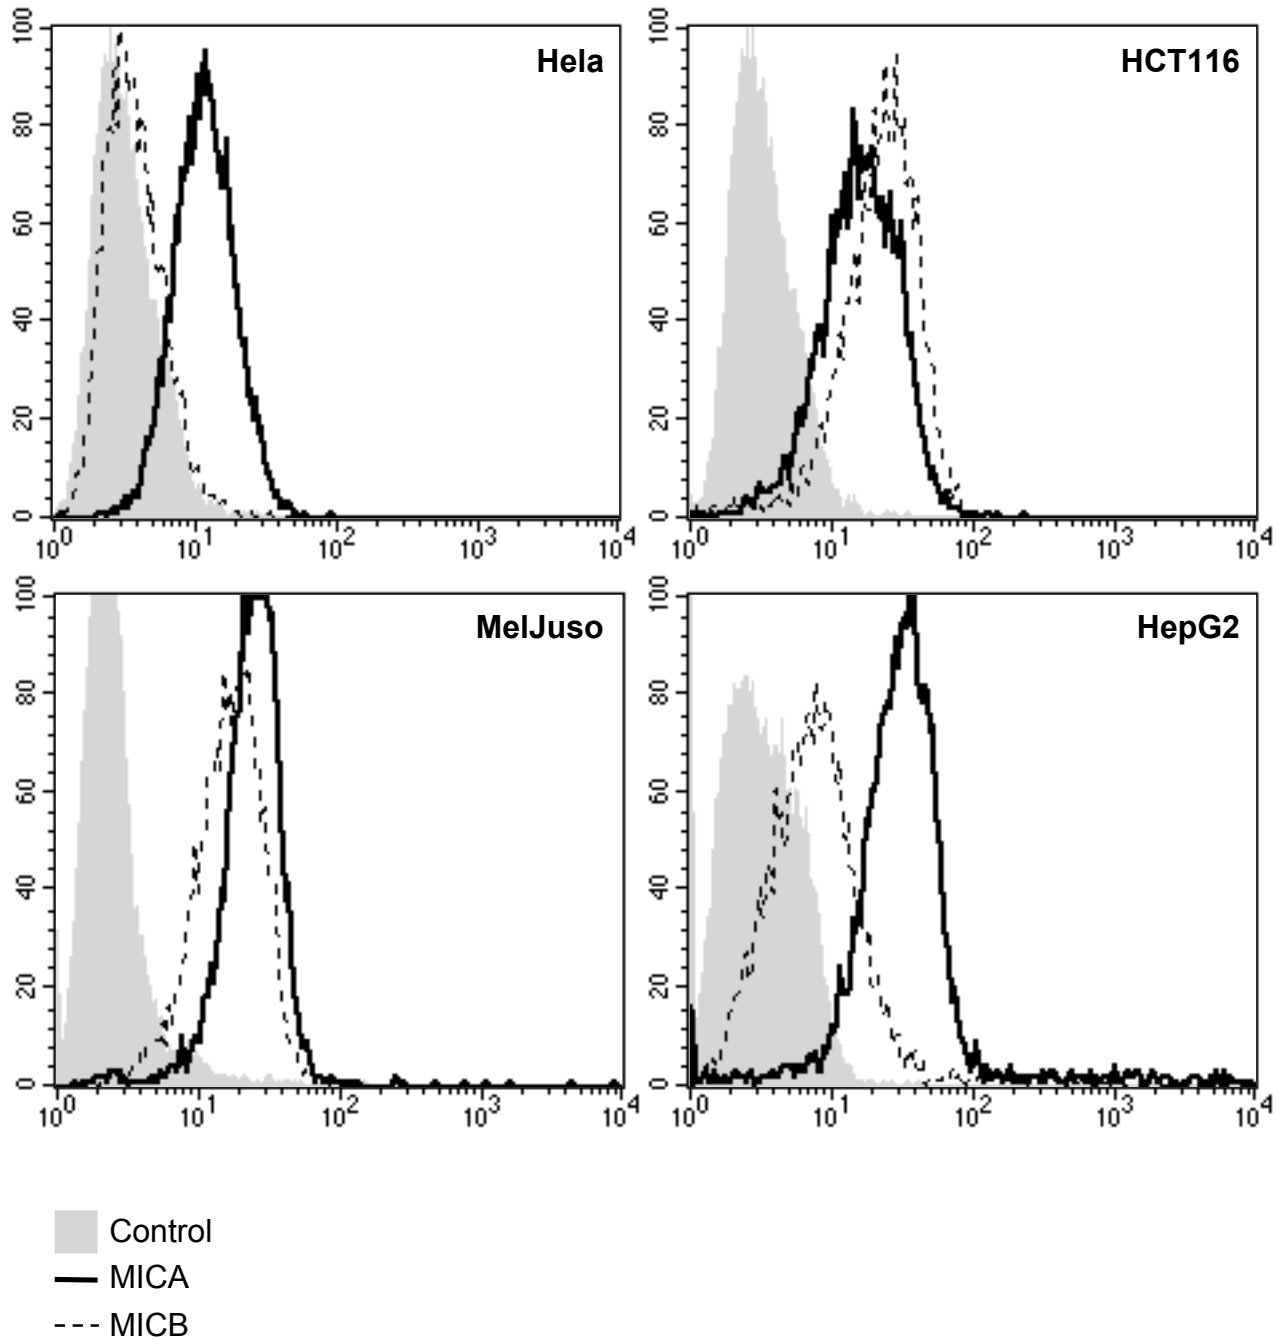

Cells were detached from the tissue culture flask by incubation at 4°C in PBS 2% BSA, 5mM EDTA, washed and then stained with control (normal mouse serum), AMO1 (MICA specific) or BMO2 (MICB specific, both from BAMOMAB GmbH, München, Germany). After washing bound first antibody was visualised using FITC conjugated F(ab)2 goat anti-mouse Ig. Samples were analysed by flow cytometry using a FACSCan cytometer running Cellquest software (BD Biosciences).

Supplementary Figure 2

A.

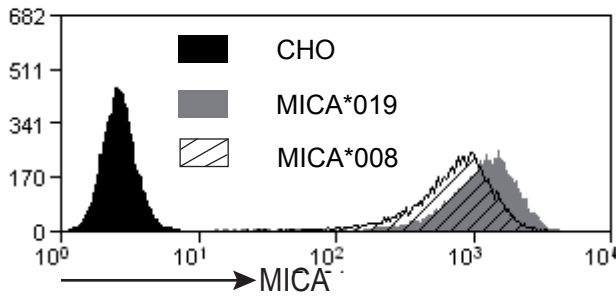

B.

```

MICA*00801      PHSRLRYNLTVLSWDGVSQSGFLAEVHLDGQPFLRYDRQKCRACKPQGQWAEDVLGNKTWDR 60
MICA*019        PHSRLRYNLTVLSWDGVSQSGFLAEVHLDGQPFLRYDRQKCRACKPQGQWAEDVLGNKTWDR 60
*****

MICA*00801      ETRDLTGNGKDLRMTLAHIKDQKEGLHSLQEIRVCEIHEDNSTRSSQHFYYDGELFLSQN 120
MICA*019        ETRDLTGNGKDLRMTLAHIKDQKEGLHSLQEIRVCEIHEDNSTRSSQHFYYDGELFLSQN 120
*****

MICA*00801      LETEEWTVPQSSRAQTLAMNVRNFLKEDAMKTKTHYHAMHADCLQELRRYLESGVVLRRRT 180
MICA*019        LETEEWTVPQSSRAQTLAMNVRNFLKEDAMKTKTHYHAMHADCLQELRRYLESSVVLRRRT 180
*****

MICA*00801      VPPMVNVTRESEASEGNITVTCRASSFYPRNIILTWQRDGVSLSHDTQQWGDVLPDNGNTY 240
MICA*019        VPPMVNVTRESEASEGNITVTCRASSFYPRNIILTWQRDGVSLSHDTQQWGDVLPDNGNTY 240
*****

MICA*00801      QTWVATRICRGEEQRFTCYMEHSGNHSTHPVPSGKVLVLQSHWQTFHVSAVAAGCCYFCY 300
MICA*019        QTWVATRICRGEEQRFTCYMEHSGNHSTHPVPSGKVLVLQSHWQTFHVSAVA*****IFVI 300
*****

MICA*00801      YYFLCPLL----- 309
MICA*019        IIFYVRCKKKTSAAEPELVLSLQVLDQHPVGTSDHRDATQLGFQPLMSALGSTGSTEGA 360
*
    
```

Supplementary Figure 2

A. FACS profiles of the CHO cell transfectants expressing MICA\*019 and MICA\*008 stained with the MICA/B specific mAb from R&D systems (mAb13001).

B. Alignment of the amino-acid sequences of the MICA\*00801 and MICA\*019 alleles used in these experiments. These alleles differ by one amino acid in the extracellular domain, that is distant from the site of interaction with NKG2D

### Supplementary Figure 3

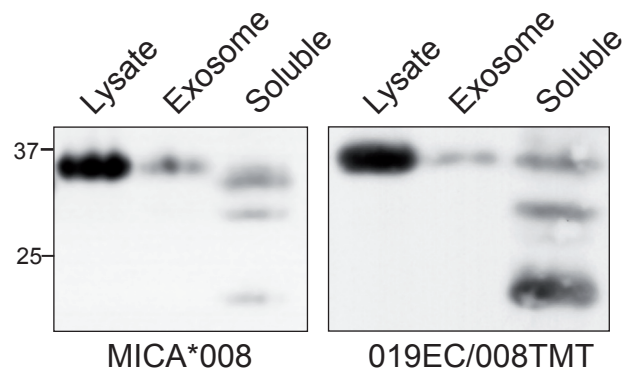

### Supplementary Figure 3

The chimaeric MICA molecule 019EC/008TMT, like MICA\*008, is released in exosomes. Exosomes and soluble proteins were isolated from cell free culture supernatants of CHO cells stably transfected with MICA\*008 or 019EC/008TMT. The preparations of exosomes and soluble proteins were digested with PNGase F, separated on 12% SDS-PAGE and then analysed by western blot using a goat polyclonal antibody specific for MICA/B.

Supplementary Table 1

Treatment of CTL with MICA\*008 containing exosomes provokes specific downregulation of cell surface NKG2D

|              | <b>Medium</b>      | <b>CHO exosomes</b> | <b>MICA*008 exosomes</b> |
|--------------|--------------------|---------------------|--------------------------|
| <b>NKG2D</b> | 21.55 <sup>a</sup> | 20.78               | 16.91                    |
| <b>CD3</b>   | 132.95             | 136.31              | 129.15                   |
| <b>CD8</b>   | 98.12              | 95.65               | 94.71                    |

<sup>a</sup> GeoMFI after indicated treatment
